# Supplementary material
Source: PubMed Central journal article supplement (PMC1735286)
Supplement: jmedgene_40_10_758_v2_1.pdf [file jmedgene_40_10_758_v2_1.pdf]

**Table 2** Multivariate probit model for cataracts (RR = relative risk, CI = confidence interval, SE = standard error)

| Covariate                                         | Estimated prevalence<br>of cataracts from<br>model (%) | Parameter<br>estimate (SE) | RR              | 95% CI      |
|---------------------------------------------------|--------------------------------------------------------|----------------------------|-----------------|-------------|
| Age at diagnosis (per year)                       |                                                        | 0.15 (0.58)                | 1.00            | 0.98 - 1.02 |
| Exchangeable dependence<br>(familial correlation) |                                                        | 0.11 (0.15)                |                 |             |
| Type of <i>NF2</i> mutation                       |                                                        |                            |                 |             |
| Nonsense or frameshift                            |                                                        |                            |                 |             |
| Classical <i>NF2</i>                              | 45                                                     | Reference group            | Reference group |             |
| Somatic mosaic                                    | 17                                                     | -0.82 (0.18)               | 0.20            | 0.10 - 0.40 |
| Splice-site                                       | 39                                                     | -0.17 (0.19)               | 0.71            | 0.34 - 1.50 |
| Missense                                          | 28                                                     | -0.48 (0.26)               | 0.38            | 0.14 - 1.08 |
| Large deletion                                    | 28                                                     | -0.47 (0.23)               | 0.39            | 0.16 - 0.98 |
| Unfound                                           |                                                        |                            |                 |             |
| People with new mutations                         |                                                        |                            |                 |             |
| Age at onset < 20 years                           | 39                                                     | -0.15 (0.15)               | 0.74            | 0.40 - 1.36 |
| Age at onset $\geq$ 20 years                      | 9                                                      | -1.20 (0.28)               | 0.09            | 0.03 - 0.28 |
| Inherited cases                                   | 36                                                     | -0.23 (0.34)               | 0.63            | 0.16 - 2.45 |
